# Supplementary material
Source: Springer Nature journal article supplement (https://www.springermedizin.de/resource/supplementary/13018_2007_66_MOESM2_ESM.pdf/9636250)

**A**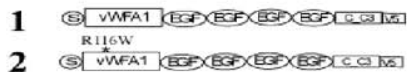

**R116W**

mouse 110 IGATDTRVAVV 120  
 ||:::|||||  
 human 115 IGPADTRVAVV 125

**B**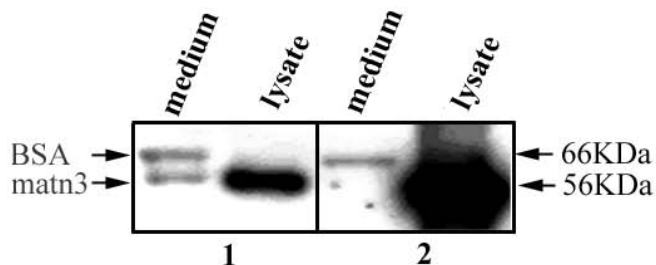**C**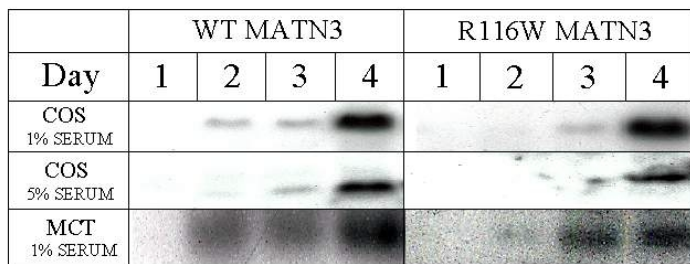**D**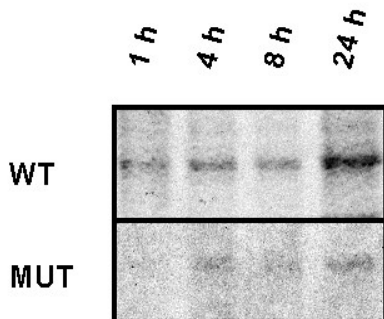**E**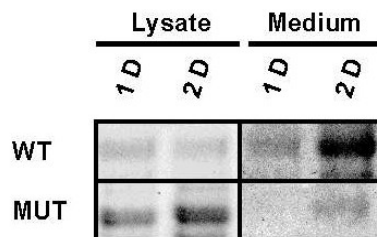

Supplement: MOESM2 [file 9636250]
